# Supplementary material
Source: MDPI journal article supplement (https://www.mdpi.com/2073-445X/13/4/477)
Supplement: s1 [file land-2868357-supplementary.xlsx]

## Sheet: C14 dates
Table S1. Archaeological radiocarbon dataset of the southern Tarim Basin.
Site name	Site type	Administration	Material	Technique	Lab code	14C age (BP)	14C uncertainty	Calibrated age (cal. BCE/CE) by IntCal20				Archaeological context	Reference
								median	σ	2σ from	2σ to
Akekaoqikaranke	City	Minfeng, Hetian	Branch	AMS	LZU19091	285	20	1560	50	1520	1660	Location 1 - upper southeast gate	This study.
Akekaoqikaranke	City	Minfeng, Hetian	Branch	AMS	LZU19092	335	20	1570	40	1480	1640	Location 1 - lower southeast gate	This study.
Akekaoqikaranke	City	Minfeng, Hetian	Charcoal	AMS	LZU19093	535	20	1410	20	1320	1440	Location 2 - building wall	This study.
Akekaoqikaranke	City	Minfeng, Hetian	Branch	AMS	LZU19094	325	20	1560	40	1490	1640	Location 3 - upper building wall	This study.
Akekaoqikaranke	City	Minfeng, Hetian	Charcoal	AMS	LZU19095	410	25	1470	50	1430	1620	Location 3 - lower building wall	This study.
Akekaoqikaranke	City	Minfeng, Hetian	Branch	AMS	LZU19096	310	25	1560	40	1490	1650	Location 4 - southwest city wall	This study.
Aqike	Fortress	Hetian, Hetian	Straw	AMS	LZU19112	1420	25	630	20	590	660	Location 1 - lower south wall	This study.
Aqike	Fortress	Hetian, Hetian	Branch	AMS	LZU19113	1410	20	640	20	600	660	Location 2 - upper east wall	This study.
Asa	Fortress	Cele, Hetian	Wood	AMS	LZU19103	1285	25	730	40	660	780	Upper south city wall	This study.
Asa	Fortress	Cele, Hetian	Wood	AMS	LZU19104	1305	25	720	40	650	780	Lower south city wall	This study.
Axi	Fortress	Cele, Hetian	Wood	AMS	LZU19105	2465	25	-630	90	-760	-420	Upper south city wall	This study.
Axi	Fortress	Cele, Hetian	Branch	AMS	LZU19106	2390	25	-460	60	-550	-390	Lower south city wall	This study.
Bugunluke	Beacon	Qiemo, Bayingol	Wood	AMS	LZU19089	1245	25	750	60	670	880	Upper southeast corner	This study.
Bugunluke	Beacon	Qiemo, Bayingol	Wood	AMS	LZU19090	1240	20	790	50	680	880	Lower southeast corner	This study.
Dandanwulike	City	Cele, Hetian	Reed	AMS	LZU19097	1230	25	800	50	680	890	Location 1 - building wall	This study.
Dandanwulike	City	Cele, Hetian	Reed	AMS	LZU19098	1275	25	730	40	660	820	Location 2 - builiding foundation	This study.
Dandanwulike	City	Cele, Hetian	Fabric	AMS	LZU19099	1055	30	1000	40	890	1040	Location 2 - builiding foundation	This study.
Dandanwulike	City	Cele, Hetian	Reed	AMS	LZU19100	1225	25	810	50	690	890	Location 3 - city wall	This study.
Dandanwulike	City	Cele, Hetian	Straw	AMS	LZU19101	1285	30	730	40	660	820	Location 4 - northwest city wall	This study.
Dandanwulike	City	Cele, Hetian	Wood	AMS	LZU19102	1185	20	840	40	770	900	Location 5 - building wall in northwest corner	This study.
Duwaxi	Beacon	Moyu, Hetian	Branch	AMS	LZU19107	1080	25	970	40	890	1030	Foundation	This study.
Jiandatierimu	Beacon	Qiemo, Bayingol	Straw	AMS	LZU19087	1085	30	960	40	890	1030	South wall	This study.
Mailikeawati	City	Hetian, Hetian	Charcoal	AMS	LZU19109	1360	40	670	50	600	780	Ash pit	This study.
Puji	Fortress	Hetian, Hetian	Wood	AMS	LZU19110	1440	25	620	20	580	660	Upper east gate	This study.
Puji	Fortress	Hetian, Hetian	Branch	AMS	LZU19111	1460	25	610	20	570	650	Lower east gate	This study.
Jiawaairike	Cemetery	Qiemo, Bayingol	Wood	Conventional	ZK-2920	2403	80	-530	130	-780	-360	95XQJM5	[46]
Jiawaairike	Cemetery	Qiemo, Bayingol	Wood	Conventional	ZK-2918	2255	89	-290	130	-720	-40	95XQJM3	[46]
Jiawaairike	Cemetery	Qiemo, Bayingol	Wood	Conventional	ZK-2916	2438	92	-570	120	-800	-380	95XQJM1	[46]
Kaladun	City	Yutian, Hetian	unknown	Conventional	unknown 1	1910	250	90	300	-520	650	N61	[47]
Kaladun	City	Yutian, Hetian	unknown	Conventional	unknown 2	1193	86	840	90	660	1000	N61	[47]
Kaladun	City	Yutian, Hetian	unknown	Conventional	unknown 3	1800	40	260	60	120	360	N62	[47]
Liushui	Cemetery	Yutian, Hetian	Wood	AMS	KIA29825	2790	25	-940	40	-1010	-840	M16 - bronze tube	[17]
Liushui	Cemetery	Yutian, Hetian	Wood	AMS	KIA29826	2715	25	-860	30	-910	-810	M55 - bronze lance	[17]
Liushui	Cemetery	Yutian, Hetian	Tar pitch	AMS	KIA29826A	2635	25	-800	20	-830	-770	M55 - bronze lance	[17]
Liushui	Cemetery	Yutian, Hetian	Wood	AMS	KIA29827	2770	25	-910	40	-990	-830	M55 - bronze axe	[17]
Liushui	Cemetery	Yutian, Hetian	Wood	AMS	KIA29828	2705	25	-850	30	-910	-800	M41 - bronze arrowhead	[17]
Liushui	Cemetery	Yutian, Hetian	Wood	AMS	KIA29829	2485	30	-630	80	-780	-480	M9 - bronze arrowhead	[17]
Liushui	Cemetery	Yutian, Hetian	Wood	AMS	KIA29830	2765	25	-900	40	-990	-830	M7 - bronze arrowhead	[17]
Liushui	Cemetery	Yutian, Hetian	Charcoal	AMS	Bln-5723	2826	39	-980	60	-1120	-850	M12	[17]
Liushui	Cemetery	Yutian, Hetian	Charcoal	AMS	Bln-5724	2497	24	-630	70	-780	-540	M15	[17]
Liushui	Cemetery	Yutian, Hetian	Charcoal	AMS	Bln-5725	2749	35	-880	40	-990	-810	M17	[17]
Liushui	Cemetery	Yutian, Hetian	Charcoal	AMS	Bln-5726	2803	32	-960	50	-1050	-840	M26	[17]
Niya	City	Minfeng, Hetian	Wood	AMS	Nagoya Univ. 5009	2190	60	-250	90	-390	-50	Northern - Dead tree	[48]
Niya	City	Minfeng, Hetian	Wood	AMS	Nagoya Univ. 5019	2355	45	-450	90	-750	-230	Northern - Dead tree	[48]
Niya	City	Minfeng, Hetian	Wood	AMS	Nagoya Univ. 5024	2360	40	-450	80	-740	-370	Northern - Entrance pillar	[48]
Niya	City	Minfeng, Hetian	Wood	AMS	Nagoya Univ. 5026	2405	95	-540	140	-800	-230	Northern - Dwelling upright pillar	[48]
Niya	City	Minfeng, Hetian	Wood	AMS	Nagoya Univ. 7001	1855	105	180	130	-100	420	Middle - Log lef in a dwelling	[48]
Niya	City	Minfeng, Hetian	Wood	AMS	Nagoya Univ. 7004	1915	95	110	120	-160	350	Middle - Dead trea in a dwelling	[48]
Niya	City	Minfeng, Hetian	Wood	AMS	Nagoya Univ. 7009	1950	40	80	60	-40	210	Middle - Dwelling pillar	[48]
Niya	City	Minfeng, Hetian	Wood	AMS	Nagoya Univ. 7043	1965	75	60	100	-160	240	Middle - Dwelling pillar	[48]
Niya	City	Minfeng, Hetian	Wood	AMS	Nagoya Univ. 6001	1560	60	500	60	400	640	Southern - Dead tree	[48]
Niya	City	Minfeng, Hetian	Wood	AMS	Nagoya Univ. 6005	1555	55	510	60	410	640	Southern - Dwelling upright pillar	[48]
Niya	City	Minfeng, Hetian	Wood	AMS	Nagoya Univ. 6012	1570	85	490	90	260	650	Southern - Dead tree	[48]
Niya	City	Minfeng, Hetian	Wood	AMS	Nagoya Univ. 6016	1695	100	360	110	120	580	Southern - Stein's ancient bridge	[48]
Niya	City	Minfeng, Hetian	Wood	AMS	Nagoya Univ. 6018	1720	80	340	90	130	550	Southern - Dwelling base member	[48]
Niya	City	Minfeng, Hetian	Wood	AMS	Nagoya Univ. 6023	1635	80	440	90	240	590	Southern - Dead tree	[48]
Shanpula	Cemetery	Yutian, Hetian	Reed	Conventional	WB84-14	2105	65	-130	100	-360	60	I M01	[49]
Shanpula	Cemetery	Yutian, Hetian	Reed	Conventional	WB84-11	2865	90	-1050	120	-1290	-820	I M02	[49]
Shanpula	Cemetery	Yutian, Hetian	Wood	Conventional	WB84-17	2205	75	-260	100	-400	-50	I M02	[49]
Shanpula	Cemetery	Yutian, Hetian	Charcoal	Conventional	WB84-19	2290	65	-320	100	-550	-160	I M02	[49]
Shanpula	Cemetery	Yutian, Hetian	Hair	Conventional	XZ-424	2038	62	-40	90	-340	130	I M02	[49]
Shanpula	Cemetery	Yutian, Hetian	Reed	Conventional	WB84-12	1770	95	290	110	60	540	I M06	[49]
Shanpula	Cemetery	Yutian, Hetian	Wood	Conventional	WB84-15	1995	75	20	100	-180	220	I M16	[49]
Shanpula	Cemetery	Yutian, Hetian	Wood	Conventional	XZ-425	2165	59	-210	90	-380	-50	I M24	[49]
Shanpula	Cemetery	Yutian, Hetian	Straw	Conventional	XZ-422	2040	59	-40	90	-200	130	I M49	[49]
Shanpula	Cemetery	Yutian, Hetian	Wood	Conventional	XZ-423	2089	74	-110	110	-360	110	I M49	[49]
Yangchang	Palaeolithic profile	Minfeng, Hetian	Charcoal	Conventional	unknown 17	6510	70	-5460	70	-5620	-5320	Cultural layer 17.15 m	[44]
Yangchang	Palaeolithic profile	Minfeng, Hetian	Charcoal	AMS	BA110720	6220	45	-5150	80	-5310	-5040	Cultural layer 17.10 m	[44]
Yangchang	Palaeolithic profile	Minfeng, Hetian	Bone collagen	AMS	BA110721	6280	60	-5250	80	-5380	-5050	Cultural layer 17.10 m	[44]
Yangchang	Palaeolithic profile	Minfeng, Hetian	Bone collagen	AMS	BA110722	6220	70	-5160	90	-5330	-4990	Cultural layer 17.15 m	[44]
Yuansha	City	Yutian, Hetian	Wood	Conventional	LUG09-01	1843	51	200	70	70	340	Building fundation - populus	[36]
Yuansha	City	Yutian, Hetian	Faeces	Conventional	LUG09-11	2001	53	20	70	-160	160	Layer of sheep/goat faeces	[36]
Yuansha	City	Yutian, Hetian	Wood	Conventional	LUG09-12	2045	53	-40	80	-200	120	Chopped populus trunk	[36]
Yuansha	City	Yutian, Hetian	Faeces	Conventional	LUG09-13	1689	52	370	70	240	540	Layer of sheep/goat faeces	[36]
Yuansha	City	Yutian, Hetian	Faeces	Conventional	LUG09-05	1691	52	370	70	240	540	Layer of sheep/goat faeces	[36]
Yuansha	City	Yutian, Hetian	Branch	Conventional	LUG09-06	1898	52	140	70	-30	250	Chopped populus branch	[36]
Yuansha	City	Yutian, Hetian	Wood	Conventional	LUG09-03	2473	53	-610	100	-780	-410	West city wall - populus	[36]
Yuansha	City	Yutian, Hetian	Faeces	Conventional	LUG09-07	2355	63	-460	130	-760	-200	Layer of sheep/goat faeces	[36]
Yuansha	City	Yutian, Hetian	Charcoal	Conventional	unknown 4	2130	50	-160	90	-360	10	West city wall	[47]
Yuansha	City	Yutian, Hetian	Charcoal	Conventional	unknown 5	2130	15	-150	60	-340	-50	South city gate	[47]
Yuansha	City	Yutian, Hetian	Charcoal	Conventional	unknown 6	2005	15	1	30	-50	70	South city gate	[47]
Yuansha	City	Yutian, Hetian	Wood	Conventional	unknown 7	2260	55	-290	70	-410	-170	South city gate	[47]
Yuansha	City	Yutian, Hetian	Wood	Conventional	unknown 8	1290	50	730	60	650	880	South city gate	[47]
Yuansha	Cemetery	Yutian, Hetian	Reed	Conventional	unknown 9	2140	100	-170	130	-400	70	BM15	[47]
Zhagunluke	Cemetery	Qiemo, Bayingol	Wood stick	Conventional	unknown 10	unknown	unknown	-1508	76	unknown	unknown	M61	[45]
Zhagunluke	Cemetery	Qiemo, Bayingol	Tamarix branch	Conventional	unknown 11	unknown	unknown	-792	60	unknown	unknown	M1	[45]
Zhagunluke	Cemetery	Qiemo, Bayingol	Wood	Conventional	unknown 12	unknown	unknown	-389	59	unknown	unknown	M4	[45]
Zhagunluke	Cemetery	Qiemo, Bayingol	Tamarix branch	Conventional	unknown 13	unknown	unknown	-761	61	unknown	unknown	M14	[45]
Zhagunluke	Cemetery	Qiemo, Bayingol	Wood	Conventional	unknown 14	unknown	unknown	-896	61	unknown	unknown	M24	[45]
Zhagunluke	Cemetery	Qiemo, Bayingol	unknown	Conventional	unknown 15	unknown	unknown	-1010	115	unknown	unknown	85M2	[45]
Zhagunluke	Cemetery	Qiemo, Bayingol	unknown	Conventional	unknown 16	unknown	unknown	-740	120	unknown	unknown	85M4	[45]
